# Supplementary material
Source: PubMed Central journal article supplement (PMC2656571)
Supplement: NIHMS91460-supplement-1_si_001.pdf [file NIHMS91460-supplement-1_si_001.pdf]

## Supporting Information

### Design, Synthesis, and Biological Evaluation of *N*-Carboxyphenylpyrrole Derivatives as Potent HIV Fusion Inhibitors Targeting gp41

Kun Liu<sup>a</sup>, Hong Lu<sup>b</sup>, Ling Hou<sup>a</sup>, Zhi Qi<sup>b</sup>, Cátia Teixeira<sup>c</sup>, Florent Barbault<sup>c</sup>, Bo-Tao Fan<sup>c</sup>,  
Shuwen Liu<sup>d</sup>, Shibo Jiang<sup>b,d\*</sup>, and Lan Xie<sup>a\*</sup>

<sup>a</sup> Beijing Institute of Pharmacology & Toxicology, 27 Tai-Ping Road, Beijing, 100850, China

<sup>b</sup> Lindsley F. Kimball Research Institute, New York Blood Center, New York, NY 10065, USA

<sup>c</sup> ITODYS, University Paris 7 – CNRS UMR 7086, 1 rue Guy de la Brosse 75005, Paris, France

<sup>d</sup> School of Pharmaceutical Sciences, Southern Medical University, Guangzhou, 510515, China

#### Contents.

1. Elemental Analysis Data
2. HPLC Conditions and Summary of HPLC purity Data for final compounds
3. HPLC tracings for final compounds **A<sub>15</sub>**, **B<sub>3-13</sub>**, **B<sub>15</sub>** and **B<sub>18-22</sub>**

\*Corresponding authors: L. Xie and S. Jiang

Phone: 86-10-6828-1014, Fax: 86-10-6821-1656; E-mail: lanxieshi@yahoo.com (L. Xie);

Phone: 212-570-3058, Fax: 212-570-3099; E-mail: SJiang@NYBloodCenter.org (S. Jiang)

## Elemental Analysis Data

| Compounds #     | Formula                                                                              | Calculation |      |       | Found |      |       |
|-----------------|--------------------------------------------------------------------------------------|-------------|------|-------|-------|------|-------|
|                 |                                                                                      | C           | H    | N     | C     | H    | N     |
| A <sub>1</sub>  | C <sub>11</sub> H <sub>8</sub> ClNO <sub>2</sub>                                     | 59.61       | 3.64 | 6.32  | 60.10 | 3.65 | 5.92  |
| A <sub>2</sub>  | C <sub>11</sub> H <sub>9</sub> NO <sub>3</sub>                                       | 65.02       | 4.46 | 6.89  | 65.18 | 4.12 | 6.34  |
| A <sub>3</sub>  | C <sub>11</sub> H <sub>9</sub> NO <sub>2</sub>                                       | 70.58       | 4.85 | 7.48  | 70.59 | 4.82 | 7.36  |
| A <sub>4</sub>  | C <sub>11</sub> H <sub>9</sub> N <sub>5</sub>                                        | 62.55       | 4.29 | 33.16 | 62.17 | 4.22 | 33.97 |
| A <sub>5</sub>  | C <sub>12</sub> H <sub>11</sub> NO <sub>3</sub> ·1/8 H <sub>2</sub> O                | 65.72       | 5.17 | 6.39  | 65.64 | 5.05 | 6.12  |
| A <sub>6</sub>  | C <sub>11</sub> H <sub>9</sub> NO <sub>2</sub>                                       | 70.58       | 4.85 | 7.48  | 70.30 | 4.66 | 7.16  |
| A <sub>7</sub>  | C <sub>12</sub> H <sub>11</sub> NO <sub>2</sub> ·1/8 H <sub>2</sub> O                | 70.84       | 5.57 | 6.88  | 70.68 | 5.44 | 6.80  |
| A <sub>8</sub>  | C <sub>11</sub> H <sub>9</sub> NO <sub>3</sub>                                       | 65.02       | 4.46 | 6.89  | 65.64 | 4.49 | 6.51  |
| A <sub>9</sub>  | C <sub>12</sub> H <sub>11</sub> NO <sub>2</sub>                                      | 71.63       | 5.51 | 6.96  | 71.38 | 5.49 | 6.82  |
| A <sub>10</sub> | C <sub>13</sub> H <sub>13</sub> NO <sub>2</sub> ·1/8 H <sub>2</sub> O                | 71.79       | 6.09 | 6.44  | 71.79 | 6.05 | 6.33  |
| A <sub>11</sub> | C <sub>13</sub> H <sub>12</sub> ClNO <sub>2</sub>                                    | 62.53       | 4.84 | 5.61  | 62.37 | 4.82 | 5.49  |
| A <sub>12</sub> | C <sub>13</sub> H <sub>13</sub> NO <sub>3</sub> ·1/8 H <sub>2</sub> O                | 66.92       | 5.68 | 6.00  | 67.30 | 5.85 | 5.64  |
| A <sub>13</sub> | C <sub>13</sub> H <sub>13</sub> NO <sub>2</sub>                                      | 72.54       | 6.09 | 6.51  | 72.52 | 6.13 | 6.31  |
| A <sub>14</sub> | C <sub>13</sub> H <sub>13</sub> N <sub>5</sub>                                       | 65.25       | 5.48 | 29.27 | 65.43 | 5.71 | 28.95 |
| A <sub>16</sub> | C <sub>13</sub> H <sub>13</sub> NO <sub>2</sub>                                      | 72.54       | 6.09 | 6.51  | 72.62 | 6.16 | 6.39  |
| A <sub>17</sub> | C <sub>14</sub> H <sub>15</sub> NO <sub>2</sub>                                      | 73.34       | 6.59 | 6.11  | 73.83 | 6.90 | 5.87  |
| A <sub>18</sub> | C <sub>13</sub> H <sub>12</sub> ClNO <sub>2</sub> ·1/8 H <sub>2</sub> O              | 61.97       | 4.87 | 5.56  | 61.95 | 4.69 | 5.24  |
| A <sub>19</sub> | C <sub>14</sub> H <sub>15</sub> NO <sub>2</sub>                                      | 73.34       | 6.59 | 6.11  | 73.44 | 6.73 | 5.82  |
| A <sub>20</sub> | C <sub>12</sub> H <sub>14</sub> N <sub>2</sub> O <sub>2</sub> S                      | 57.58       | 5.64 | 11.19 | 57.51 | 5.62 | 10.83 |
| B <sub>1</sub>  | C <sub>11</sub> H <sub>9</sub> BrN <sub>2</sub> O <sub>3</sub>                       | 44.47       | 3.05 | 9.43  | 44.75 | 2.82 | 9.25  |
| B <sub>2</sub>  | C <sub>11</sub> H <sub>9</sub> ClN <sub>2</sub> O <sub>3</sub> ·1/2 H <sub>2</sub> O | 50.48       | 3.47 | 10.71 | 50.72 | 3.34 | 10.58 |
| B <sub>14</sub> | C <sub>12</sub> H <sub>9</sub> NO <sub>5</sub>                                       | 58.30       | 3.67 | 5.67  | 58.11 | 3.53 | 5.45  |
| B <sub>16</sub> | C <sub>10</sub> H <sub>6</sub> F <sub>3</sub> NOS <sub>2</sub>                       | 43.32       | 2.18 | 5.05  | 43.01 | 2.01 | 4.73  |
| B <sub>17</sub> | C <sub>10</sub> H <sub>9</sub> NO <sub>2</sub> S <sub>2</sub>                        | 50.19       | 3.79 | 5.85  | 50.13 | 3.66 | 5.60  |

### HPLC Conditions:

HPLC analysis were performed on ZORBAX Eclipse XDB-C8, 5  $\mu$ m, 4.6  $\times$  150 mm column; sample injection volume 5  $\mu$ L, at 254 nm wavelength.

Mobile phase 1: water/CH<sub>3</sub>CN 30:70; flow rate 0.8 mL/min.

Mobile phase 2: water/CH<sub>3</sub>OH 20:80; flow rate 0.6 mL/min.

### Summary of HPLC purity data for final compounds

| Code#                 | HPLC-1               |          | HPLC-2               |          |
|-----------------------|----------------------|----------|----------------------|----------|
|                       | Retention time (min) | Purity % | Retention time (min) | Purity % |
| <b>A<sub>15</sub></b> | 7.35                 | 98.6     | 7.77                 | 95.9     |
| <b>B<sub>3</sub></b>  | 2.96                 | 98.7     | 2.57                 | 96.7     |
| <b>B<sub>4</sub></b>  | 2.18                 | 97.1     | 2.71                 | 98.6     |
| <b>B<sub>5</sub></b>  | 1.94                 | 99.6     | 1.40                 | 100      |
| <b>B<sub>6</sub></b>  | 1.47                 | 99.2     | 2.65                 | 98.4     |
| <b>B<sub>7</sub></b>  | 1.55                 | 96.2     | 3.25                 | 97.2     |
| <b>B<sub>8</sub></b>  | 1.49                 | 99.8     | 2.63                 | 95.9     |
| <b>B<sub>9</sub></b>  | 2.91                 | 97.1     | 5.70                 | 97.4     |
| <b>B<sub>10</sub></b> | 1.54                 | 97.1     | 2.95                 | 97.9     |
| <b>B<sub>11</sub></b> | 2.28                 | 96.9     | 2.75                 | 98.3     |
| <b>B<sub>12</sub></b> | 1.91                 | 98.9     | 2.06                 | 97.5     |
| <b>B<sub>13</sub></b> | 1.44                 | 98.5     | 2.58                 | 99.5     |
| <b>B<sub>15</sub></b> | 2.01                 | 97.5     | 1.85                 | 98.5     |
| <b>B<sub>18</sub></b> | 2.07                 | 99.6     | 2.65                 | 98.5     |
| <b>B<sub>19</sub></b> | 2.05                 | 99.8     | 2.05                 | 98.9     |
| <b>B<sub>20</sub></b> | 2.05                 | 99.8     | 2.05                 | 99.7     |
| <b>B<sub>21</sub></b> | 2.15                 | 99.5     | 2.14                 | 99.2     |
| <b>B<sub>22</sub></b> | 2.13                 | 99.7     | 2.90                 | 98.2     |

**A15: HPLC-1 (H<sub>2</sub>O/CH<sub>3</sub>CN 30:70, flow rate 0.8 mL/min)**

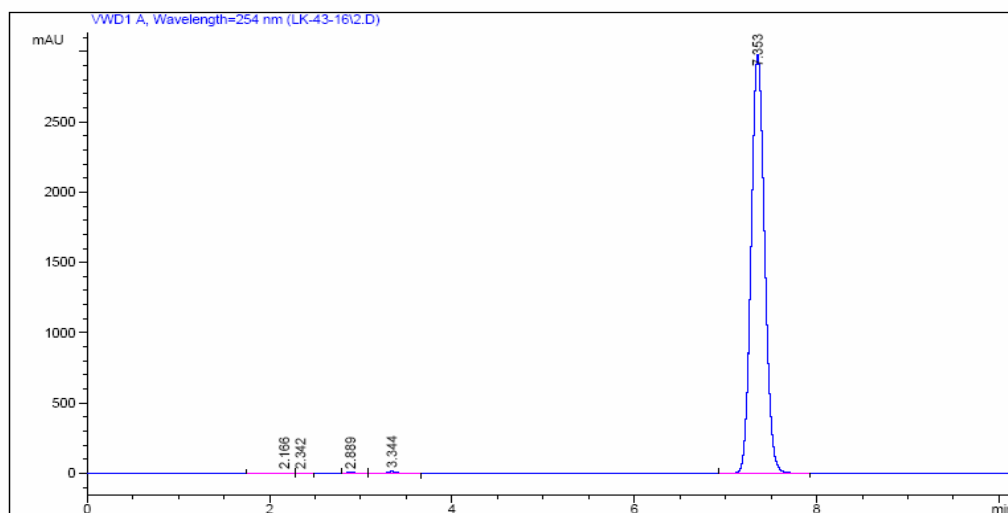

=====  
Area Percent Report  
=====

Sorted By : Signal  
Multiplier : 1.0000  
Dilution : 1.0000  
Use Multiplier & Dilution Factor with ISTDs

Signal 1: VWD1 A, Wavelength=254 nm

| Peak # | RetTime [min] | Type | Width [min] | Area mAU *s | Height [mAU] | Area %  |
|--------|---------------|------|-------------|-------------|--------------|---------|
| 1      | 2.166         | VV   | 0.3385      | 155.15916   | 6.02190      | 0.5000  |
| 2      | 2.342         | VV   | 0.1382      | 47.27467    | 4.68332      | 0.1524  |
| 3      | 2.889         | VV   | 0.1209      | 79.37608    | 9.21665      | 0.2558  |
| 4      | 3.344         | VB   | 0.1363      | 145.79961   | 14.85626     | 0.4699  |
| 5      | 7.353         | BV   | 0.1592      | 3.06014e4   | 2979.09424   | 98.6219 |

**A15: HPLC-2 (H<sub>2</sub>O/CH<sub>3</sub>OH 20:80, flow rate 0.6 mL/min)**

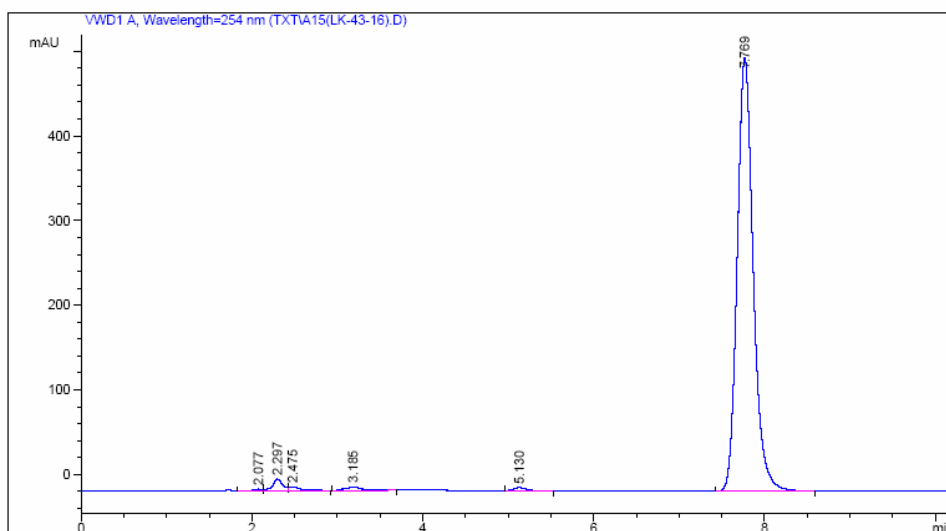

| Peak # | RetTime [min] | Type | Width [min] | Area mAU *s | Height [mAU] | Area %  |
|--------|---------------|------|-------------|-------------|--------------|---------|
| 3      | 2.475         | VB   | 0.1414      | 52.86165    | 5.03558      | 0.7599  |
| 4      | 3.185         | BB   | 0.1927      | 60.57285    | 4.31952      | 0.8707  |
| 5      | 5.130         | BB   | 0.1559      | 39.19286    | 3.82646      | 0.5634  |
| 6      | 7.769         | BB   | 0.1983      | 6668.06201  | 512.71582    | 95.8550 |

**B3: HPLC-1 (H<sub>2</sub>O/CH<sub>3</sub>CN 30:70, flow rate 0.8 mL/min)**

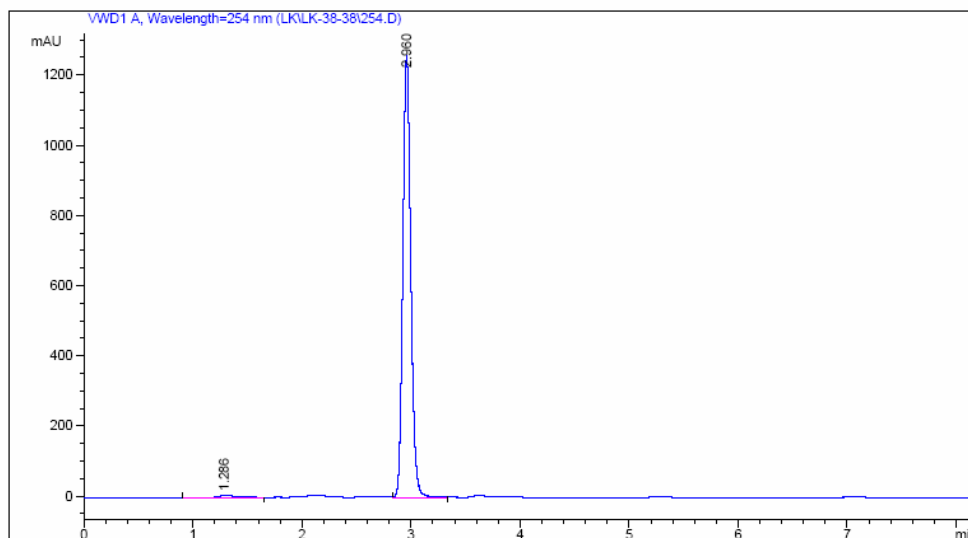

=====  
Area Percent Report  
=====

Sorted By : Signal  
Multiplier : 1.0000  
Dilution : 1.0000  
Use Multiplier & Dilution Factor with ISTDs

Signal 1: VWD1 A, Wavelength=254 nm

| Peak # | RetTime [min] | Type | Width [min] | Area mAU *s | Height [mAU] | Area %  |
|--------|---------------|------|-------------|-------------|--------------|---------|
| 1      | 1.286         | BV   | 0.1513      | 82.24670    | 7.09297      | 1.2728  |
| 2      | 2.960         | VV   | 0.0780      | 6379.42529  | 1259.15625   | 98.7272 |

**B3: HPLC-2 (H<sub>2</sub>O/CH<sub>3</sub>OH 20:80, flow rate 0.6 mL/min)**

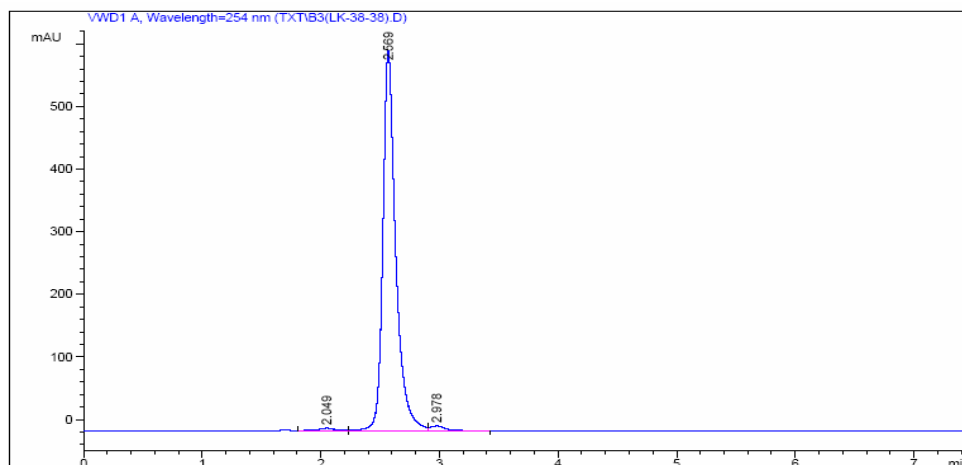

=====  
Area Percent Report  
=====

Sorted By : Signal  
Multiplier : 1.0000  
Dilution : 1.0000  
Use Multiplier & Dilution Factor with ISTDs

Signal 1: VWD1 A, Wavelength=254 nm

| Peak # | RetTime [min] | Type | Width [min] | Area mAU *s | Height [mAU] | Area %  |
|--------|---------------|------|-------------|-------------|--------------|---------|
| 1      | 2.049         | VV   | 0.1725      | 63.84985    | 4.94400      | 1.3382  |
| 2      | 2.569         | VV   | 0.1103      | 4615.87158  | 608.51855    | 96.7426 |

**B4: HPLC-1 (H<sub>2</sub>O/CH<sub>3</sub>CN 30:70, flow rate 0.8 mL/min)**

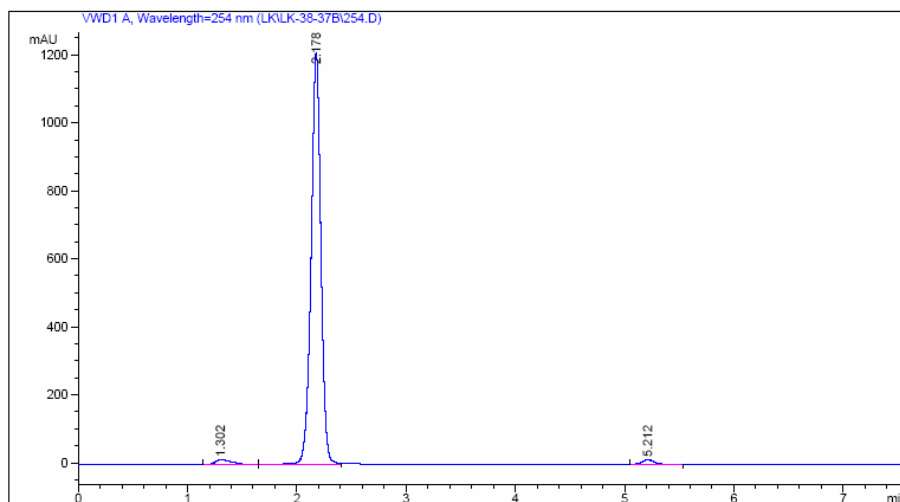

```

=====
                          Area Percent Report
=====
Sorted By      :      Signal
Multiplier     :      1.0000
Dilution      :      1.0000
Use Multiplier & Dilution Factor with ISTDs
  
```

Signal 1: VWD1 A, Wavelength=254 nm

| Peak # | RetTime [min] | Type | Width [min] | Area mAU   | Height [mAU] | Area %  |
|--------|---------------|------|-------------|------------|--------------|---------|
| 1      | 1.302         | BV   | 0.1381      | 130.55939  | 12.93653     | 1.6852  |
| 2      | 2.178         | VV   | 0.0943      | 7521.70703 | 1210.77722   | 97.0886 |

**B4: HPLC-2 (H<sub>2</sub>O/CH<sub>3</sub>OH 20:80, flow rate 0.6 mL/min)**

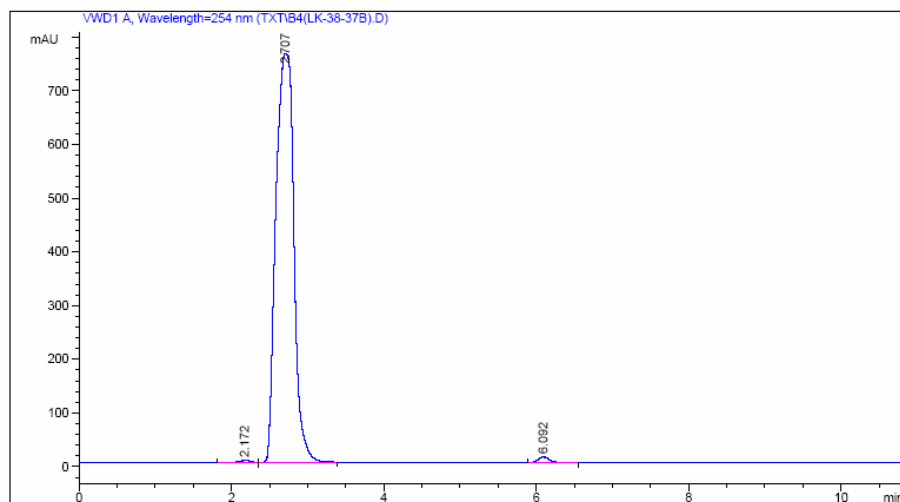

```

=====
                          Area Percent Report
=====
Sorted By      :      Signal
Multiplier     :      1.0000
Dilution      :      1.0000
Use Multiplier & Dilution Factor with ISTDs
  
```

Signal 1: VWD1 A, Wavelength=254 nm

| Peak # | RetTime [min] | Type | Width [min] | Area mAU  | Height [mAU] | Area %  |
|--------|---------------|------|-------------|-----------|--------------|---------|
| 1      | 2.172         | BV   | 0.1752      | 55.14525  | 4.19585      | 0.4342  |
| 2      | 2.707         | VV   | 0.2702      | 1.25288e4 | 762.92651    | 98.6496 |

**B5: HPLC-1 (H<sub>2</sub>O/CH<sub>3</sub>CN 30:70, flow rate 0.8 mL/min)**

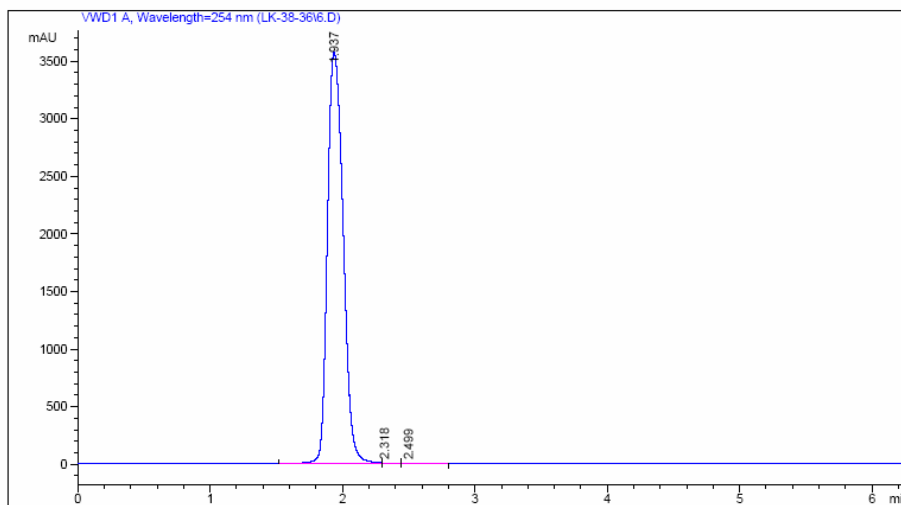

=====  
 Area Percent Report  
 =====

Sorted By : Signal  
 Multiplier : 1.0000  
 Dilution : 1.0000  
 Use Multiplier & Dilution Factor with ISIDs

Signal 1: VWD1 A, Wavelength=254 nm

| Peak # | RetTime [min] | Type | Width [min] | Area mAU *s | Height [mAU] | Area %  |
|--------|---------------|------|-------------|-------------|--------------|---------|
| 1      | 1.937         | VV   | 0.1346      | 2.96692e4   | 3579.32153   | 99.5673 |

**B5: HPLC-2 (H<sub>2</sub>O/CH<sub>3</sub>OH 20:80, flow rate 0.6 mL/min)**

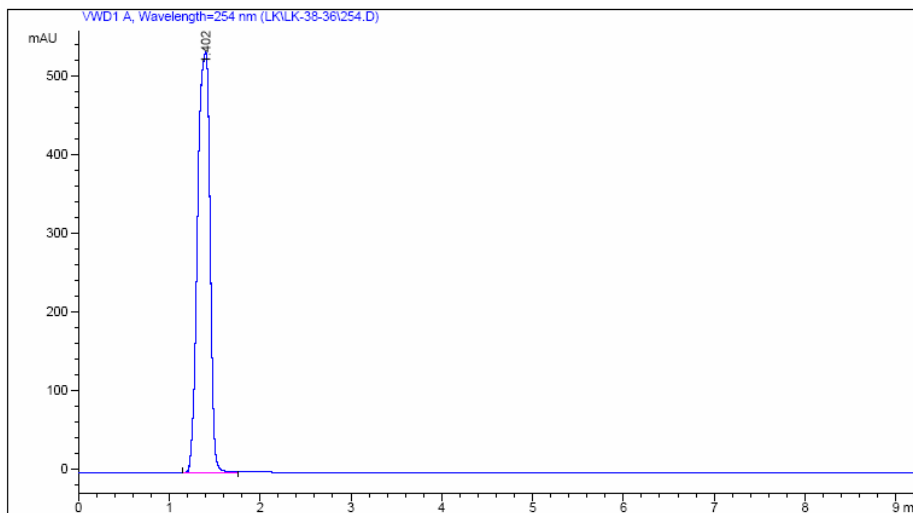

| Peak # | RetTime [min] | Type | Width [min] | Area mAU *s | Height [mAU] | Area %   |
|--------|---------------|------|-------------|-------------|--------------|----------|
| 1      | 1.402         | BB   | 0.1539      | 5060.80371  | 535.58734    | 100.0000 |

**B6: HPLC-1 (H<sub>2</sub>O/CH<sub>3</sub>CN 30:70, flow rate 0.8 mL/min)**

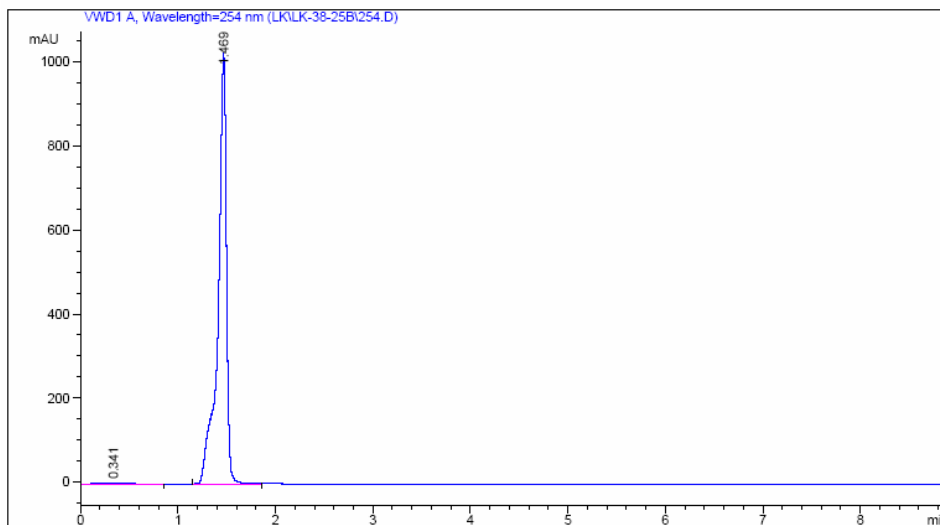

=====  
 Area Percent Report  
 =====

Sorted By : Signal  
 Multiplier : 1.0000  
 Dilution : 1.0000  
 Use Multiplier & Dilution Factor with ISTDs

Signal 1: VWD1 A, Wavelength=254 nm

| Peak # | RetTime [min] | Type | Width [min] | Area mAU *s | Height [mAU] | Area %  |
|--------|---------------|------|-------------|-------------|--------------|---------|
| 1      | 0.341         | BB   | 0.2972      | 48.96991    | 2.52936      | 0.7833  |
| 2      | 1.469         | BV   | 0.0880      | 6202.45459  | 1026.25085   | 99.2167 |

**B6: HPLC-2 (H<sub>2</sub>O/CH<sub>3</sub>OH 20:80, flow rate 0.6 mL/min)**

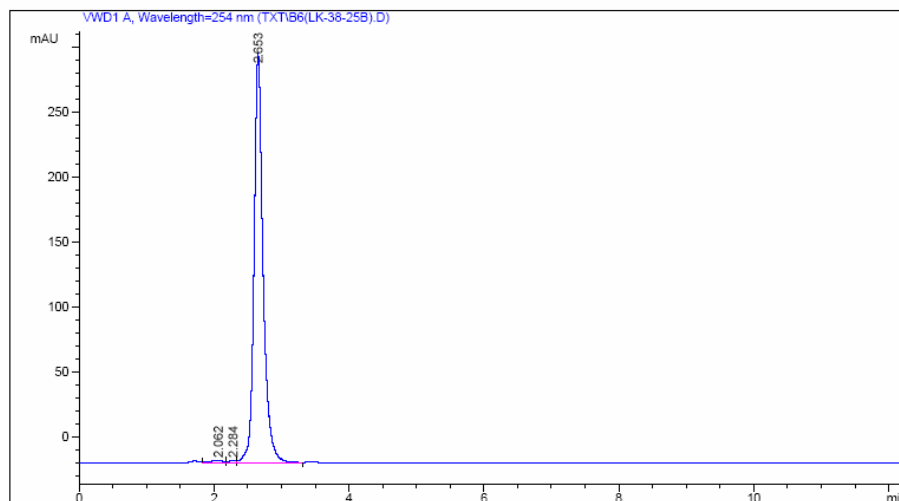

Data File C:\Chem32\1\DATA\TXT\B6(LK-38-25B).D  
 Sample Name: CLS1

| Peak # | RetTime [min] | Type | Width [min] | Area mAU *s | Height [mAU] | Area %  |
|--------|---------------|------|-------------|-------------|--------------|---------|
| 3      | 2.653         | VV   | 0.1370      | 2961.17188  | 315.90558    | 98.4139 |



**B7: HPLC-1 (H<sub>2</sub>O/CH<sub>3</sub>CN 30:70, flow rate 0.8 mL/min)**

Data File: C:\Chem32\1\DATA\LK-38-38B\254.D

Sample Name: LK-38-38B  
 Acq. Operator : LK  
 Acq. Instrument : Instrument 1  
 Injection Date : 2008-3-20 16:01:43 Location : Vial 1  
 Method : C:\Chem32\1\METHODS\DEF.LC.M  
 Last Changed : 2008-3-20 13:25:25 By LK  
 Sample Info : (modified after loading)

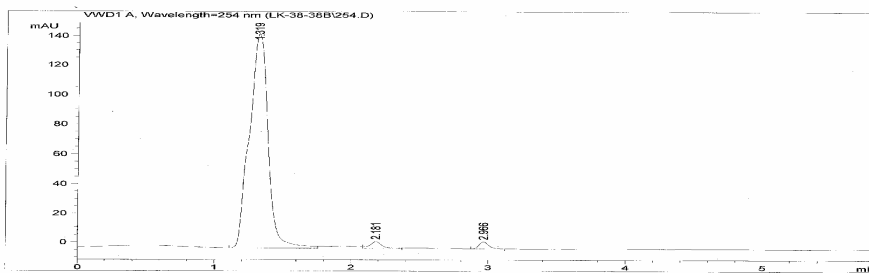

Area Percent Report

Sorted By : Signal  
 Multiplier : 1.0000  
 Dilution : 1.0000  
 Use Multiplier & Dilution Factor with ISTDs

Signal 1: VWD1 A, Wavelength=254 nm

| Peak #   | RetTime [min] | Type | Width [min] | Area mAU *s | Height [mAU] | Area %  |
|----------|---------------|------|-------------|-------------|--------------|---------|
| 1        | 1.319         | VB   | 0.1414      | 1380.96692  | 145.44109    | 96.2776 |
| 2        | 2.151         | VB   | 0.0327      | 29.42029    | 4.56044      | 2.0511  |
| 3        | 2.966         | BV   | 0.0753      | 23.37164    | 4.71405      | 1.6712  |
| Totals : |               |      |             | 1434.35885  | 154.71557    |         |

\*\*\* End of Report \*\*\*

Instrument 1 2008-3-20 16:08:25 LK

Page 1 of 1

**B7: HPLC-2 (H<sub>2</sub>O/CH<sub>3</sub>OH 20:80, flow rate 0.6 mL/min)**

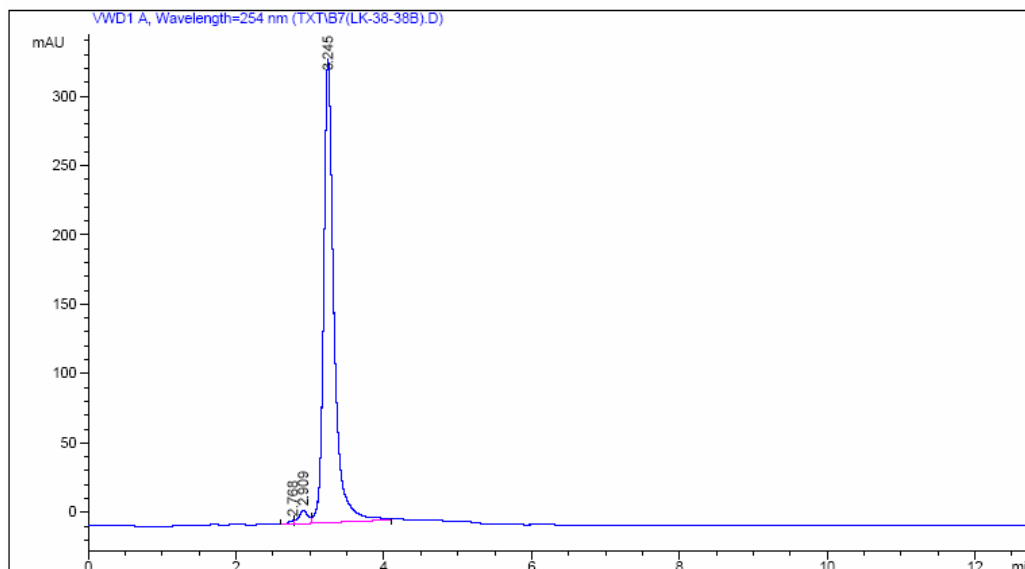

| Peak # | RetTime [min] | Type | Width [min] | Area mAU *s | Height [mAU] | Area %  |
|--------|---------------|------|-------------|-------------|--------------|---------|
| 3      | 3.245         | VB   | 0.1412      | 3257.99023  | 334.88025    | 97.2077 |

**B8: HPLC-1 (H<sub>2</sub>O/CH<sub>3</sub>CN 30:70, flow rate 0.8 mL/min)**

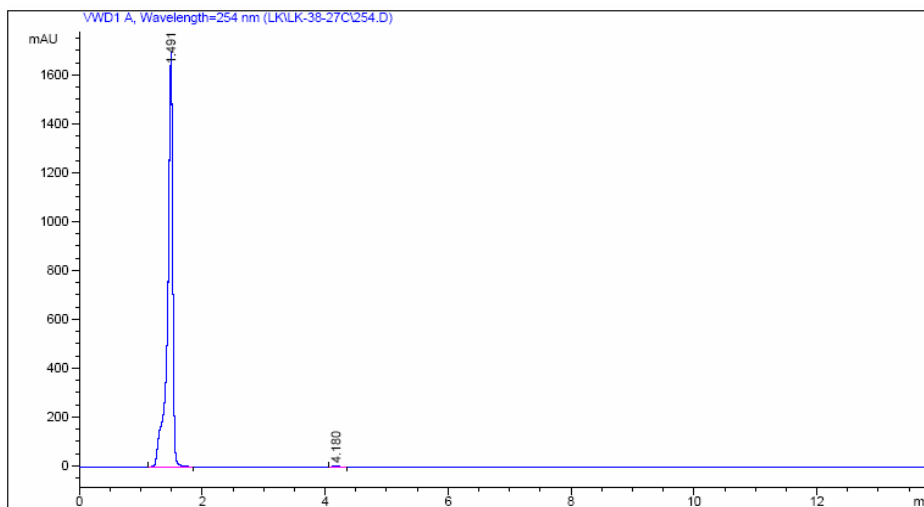

=====  
 Area Percent Report  
 =====

Sorted By : Signal  
 Multiplier : 1.0000  
 Dilution : 1.0000  
 Use Multiplier & Dilution Factor with ISTDs

Signal 1: VWD1 A, Wavelength=254 nm

| Peak # | RetTime [min] | Type | Width [min] | Area mAU *s | Height [mAU] | Area %  |
|--------|---------------|------|-------------|-------------|--------------|---------|
| 1      | 1.491         | BV   | 0.0816      | 9747.08008  | 1696.78491   | 99.7949 |

**B8: HPLC-2 (H<sub>2</sub>O/CH<sub>3</sub>OH 20:80, flow rate 0.6 mL/min)**

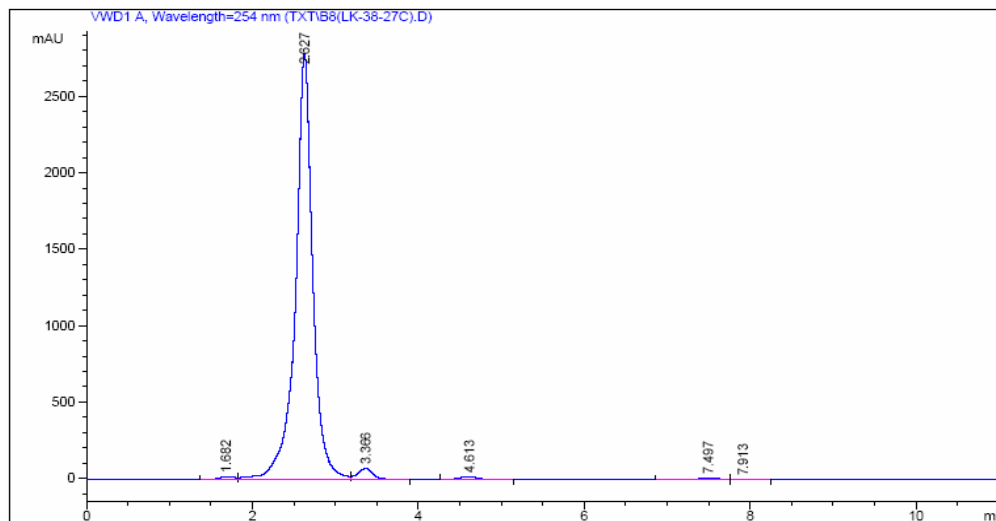

=====  
 Area Percent Report  
 =====

Sorted By : Signal  
 Multiplier : 1.0000  
 Dilution : 1.0000  
 Use Multiplier & Dilution Factor with ISTDs

Signal 1: VWD1 A, Wavelength=254 nm

| Peak # | RetTime [min] | Type | Width [min] | Area mAU *s | Height [mAU] | Area %  |
|--------|---------------|------|-------------|-------------|--------------|---------|
| 1      | 1.682         | BV   | 0.1906      | 265.06256   | 21.05449     | 0.6228  |
| 2      | 2.627         | VV   | 0.2084      | 4.08059e4   | 2791.78735   | 95.8767 |

**B9: HPLC-1 (H<sub>2</sub>O/CH<sub>3</sub>CN 30:70, flow rate 0.8 mL/min)**

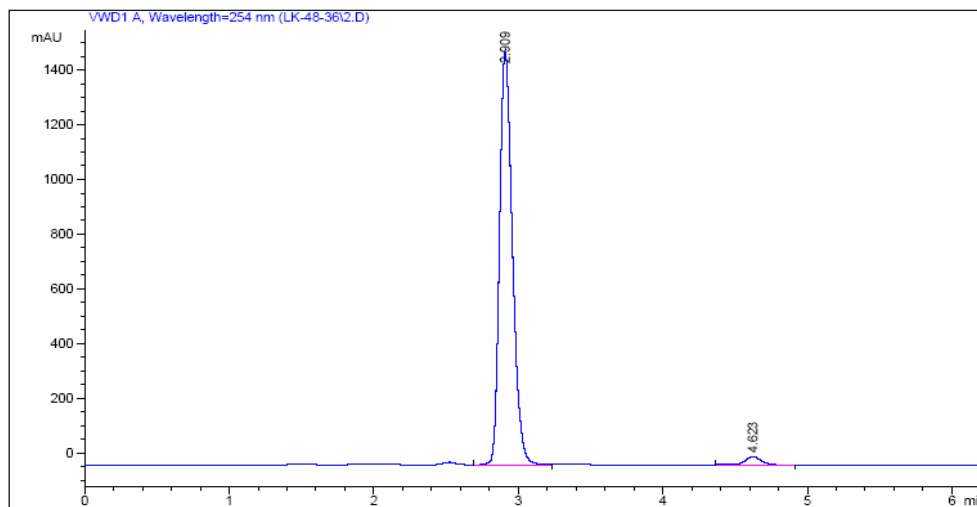

```

=====
                        Area Percent Report
=====
Sorted By      :      Signal
Multiplier    :      1.0000
Dilution      :      1.0000
Use Multiplier & Dilution Factor with ISTDs
  
```

Signal 1: VWD1 A, Wavelength=254 nm

| Peak # | RetTime [min] | Type | Width [min] | Area mAU   | Area %  | Height [mAU] | Area %  |
|--------|---------------|------|-------------|------------|---------|--------------|---------|
| 1      | 2.909         | VV   | 0.0960      | 9430.32813 | 97.1153 | 1513.35547   | 97.1153 |

**B9: HPLC-2 (H<sub>2</sub>O/CH<sub>3</sub>OH 20:80, flow rate 0.6 mL/min)**

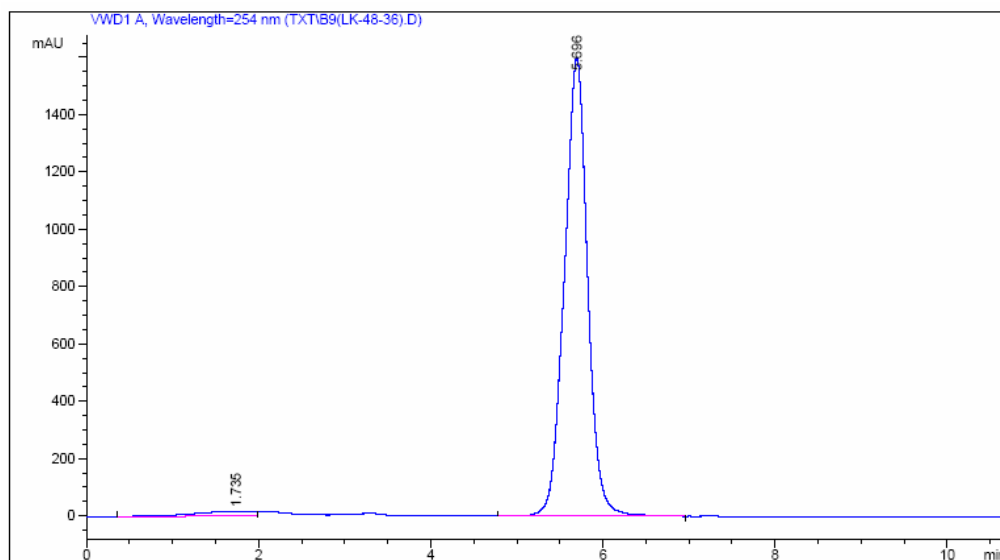

| Peak # | RetTime [min] | Type | Width [min] | Area mAU  | Area %  | Height [mAU] | Area %  |
|--------|---------------|------|-------------|-----------|---------|--------------|---------|
| 1      | 1.735         | BV   | 0.6871      | 809.01007 | 2.6338  | 17.06408     | 2.6338  |
| 2      | 5.696         | BB   | 0.2750      | 2.99073e4 | 97.3662 | 1599.10913   | 97.3662 |



**B10: HPLC-1 (H<sub>2</sub>O/CH<sub>3</sub>CN 30:70, flow rate 0.8 mL/min)**

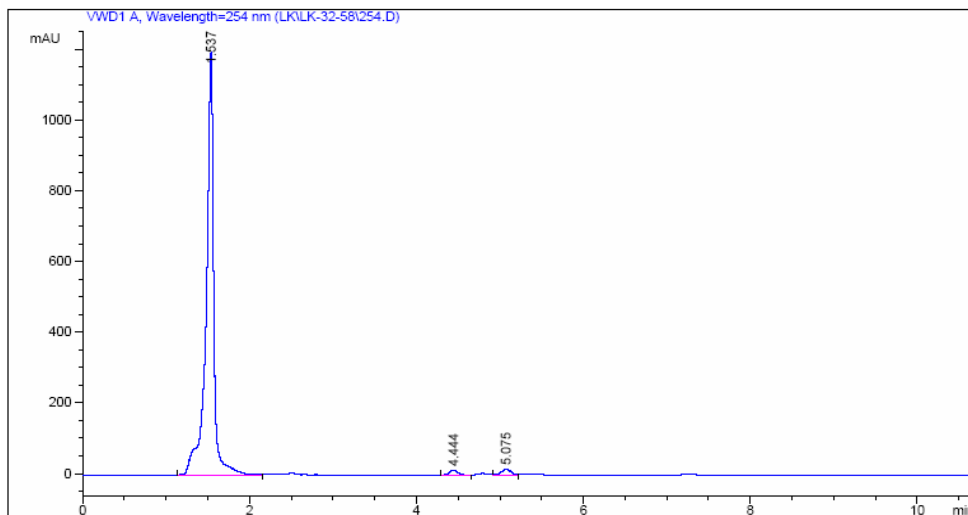

```

=====
                          Area Percent Report
=====
Sorted By      :      Signal
Multiplier    :      1.0000
Dilution      :      1.0000
Use Multiplier & Dilution Factor with ISTDs
  
```

Signal 1: VWD1 A, Wavelength=254 nm

| Peak # | RetTime [min] | Type | Width [min] | Area mAU   | Area %  | Height [mAU] |
|--------|---------------|------|-------------|------------|---------|--------------|
| 1      | 1.537         | BV   | 0.0871      | 7586.87061 | 97.0817 | 1196.93848   |

**B10: HPLC-2 (H<sub>2</sub>O/CH<sub>3</sub>OH 20:80, flow rate 0.6 mL/min)**

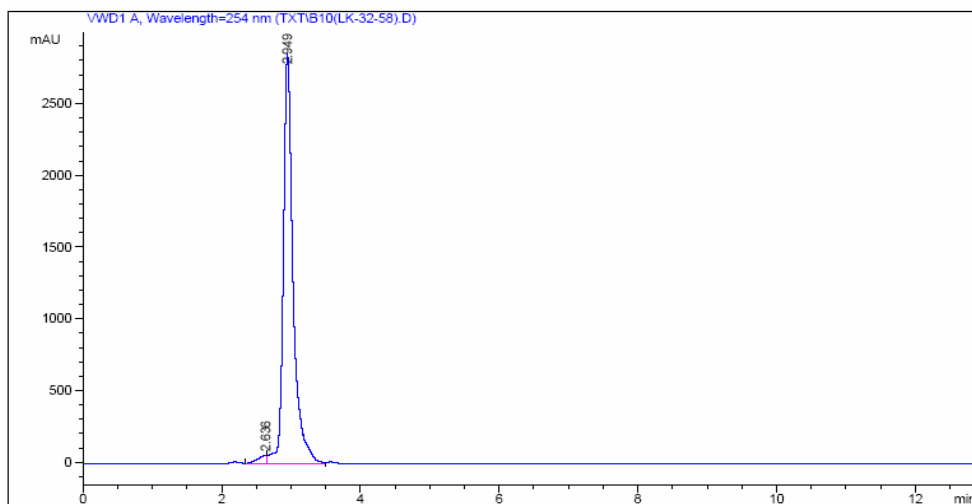

```

=====
                          Area Percent Report
=====
Sorted By      :      Signal
Multiplier    :      1.0000
Dilution      :      1.0000
Use Multiplier & Dilution Factor with ISTDs
  
```

Signal 1: VWD1 A, Wavelength=254 nm

| Peak # | RetTime [min] | Type | Width [min] | Area mAU  | Area %  | Height [mAU] |
|--------|---------------|------|-------------|-----------|---------|--------------|
| 1      | 2.636         | VV   | 0.1429      | 609.58398 | 2.1212  | 61.73075     |
| 2      | 2.949         | VV   | 0.1438      | 2.81281e4 | 97.8788 | 2860.39429   |

**B11: HPLC-1 (H<sub>2</sub>O/CH<sub>3</sub>CN 30:70, flow rate 0.8 mL/min)**

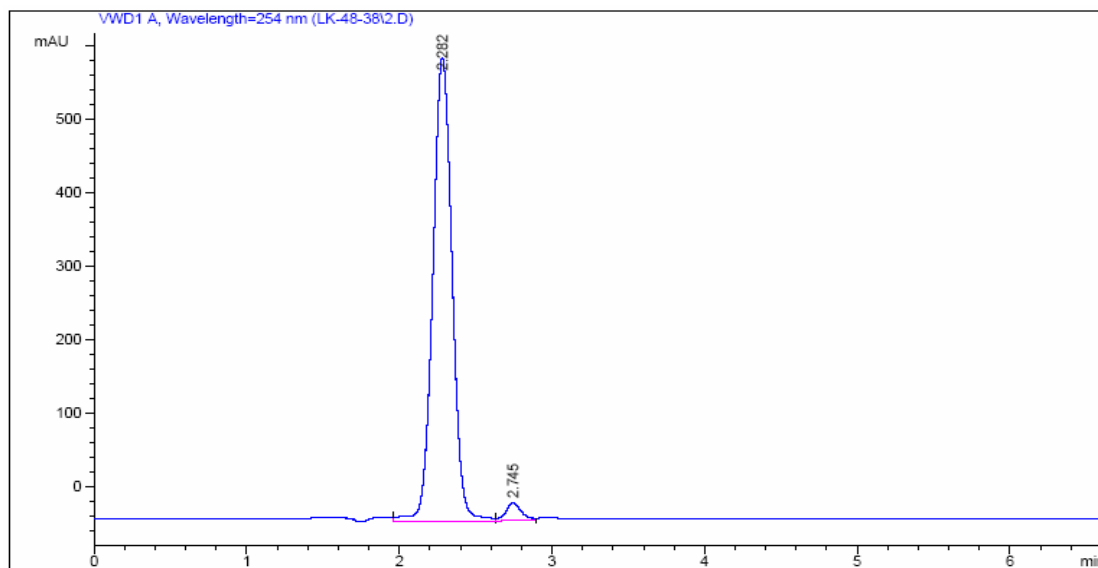

=====  
 Area Percent Report  
 =====

Sorted By : Signal  
 Multiplier : 1.0000  
 Dilution : 1.0000  
 Use Multiplier & Dilution Factor with ISTDs

Signal 1: VWD1 A, Wavelength=254 nm

| Peak # | RetTime [min] | Type | Width [min] | Area mAU *s | Height [mAU] | Area %  |
|--------|---------------|------|-------------|-------------|--------------|---------|
| 1      | 2.282         | VV   | 0.1361      | 5550.82520  | 630.96332    | 96.9352 |

**B11: HPLC-2 (H<sub>2</sub>O/CH<sub>3</sub>OH 20:80, flow rate 0.6 mL/min)**

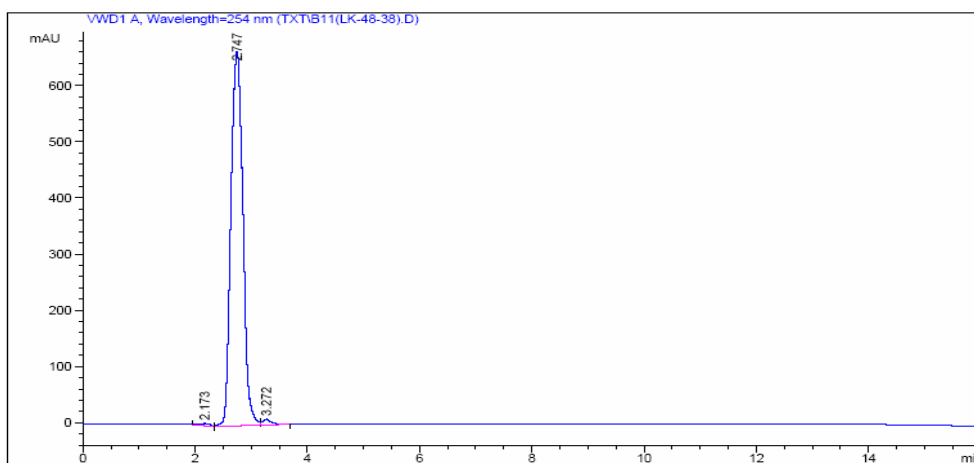

=====  
 Area Percent Report  
 =====

Sorted By : Signal  
 Multiplier : 1.0000  
 Dilution : 1.0000  
 Use Multiplier & Dilution Factor with ISTDs

Signal 1: VWD1 A, Wavelength=254 nm

| Peak # | RetTime [min] | Type | Width [min] | Area mAU *s | Height [mAU] | Area %  |
|--------|---------------|------|-------------|-------------|--------------|---------|
| 1      | 2.173         | BV   | 0.2340      | 54.90606    | 3.97336      | 0.5455  |
| 2      | 2.747         | VV   | 0.2300      | 9896.56250  | 666.54462    | 98.3260 |

**B12: HPLC-1 (H<sub>2</sub>O/CH<sub>3</sub>CN 30:70, flow rate 0.8 mL/min)**

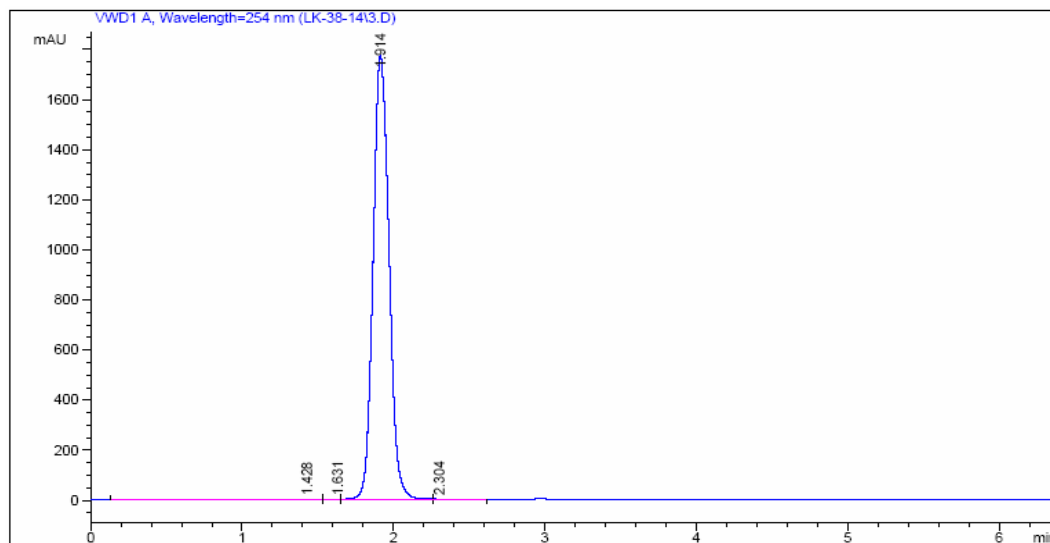

=====  
 Area Percent Report  
 =====

Sorted By : Signal  
 Multiplier : 1.0000  
 Dilution : 1.0000  
 Use Multiplier & Dilution Factor with ISTDs

Signal 1: VWD1 A, Wavelength=254 nm

| Peak # | RetTime [min] | Type | Width [min] | Area mAU *s | Height [mAU] | Area %  |
|--------|---------------|------|-------------|-------------|--------------|---------|
| 1      | 1.428         | BV   | 0.4312      | 85.71160    | 2.41682      | 0.6511  |
| 2      | 1.631         | VV   | 0.0848      | 15.65988    | 2.60160      | 0.1190  |
| 3      | 1.914         | VV   | 0.1146      | 1.30213e4   | 1776.35046   | 98.9080 |

**B12: HPLC-2 (H<sub>2</sub>O/CH<sub>3</sub>OH 20:80, flow rate 0.6 mL/min)**

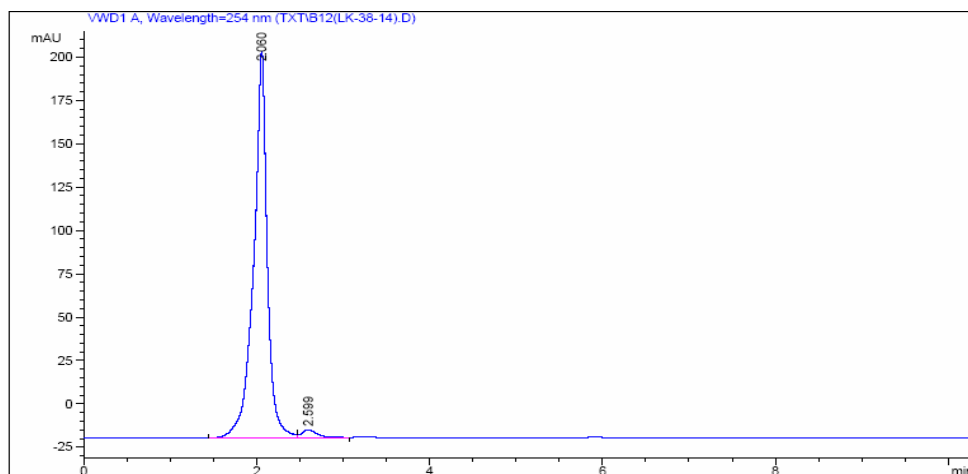

=====  
 Area Percent Report  
 =====

Sorted By : Signal  
 Multiplier : 1.0000  
 Dilution : 1.0000  
 Use Multiplier & Dilution Factor with ISTDs

Signal 1: VWD1 A, Wavelength=254 nm

| Peak # | RetTime [min] | Type | Width [min] | Area mAU *s | Height [mAU] | Area %  |
|--------|---------------|------|-------------|-------------|--------------|---------|
| 1      | 2.060         | BV   | 0.1497      | 2446.26587  | 223.29013    | 97.4603 |

**B13: HPLC-1 (H<sub>2</sub>O/CH<sub>3</sub>CN 30:70, flow rate 0.8 mL/min)**

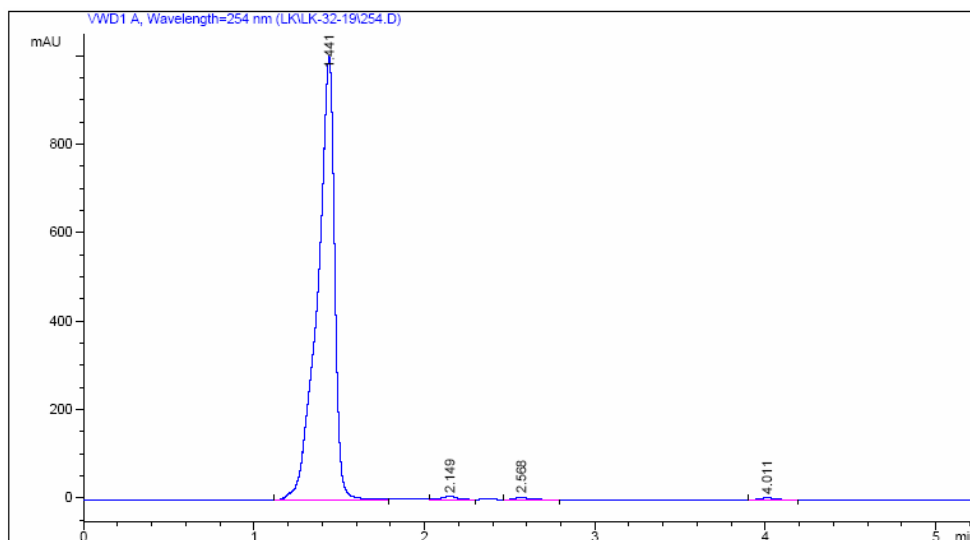

```

=====
                        Area Percent Report
=====

Sorted By      :      Signal
Multiplier     :      1.0000
Dilution       :      1.0000
Use Multiplier & Dilution Factor with ISTDs
    
```

Signal 1: VWD1 A, Wavelength=254 nm

| Peak # | RetTime [min] | Type | Width [min] | Area mAU *s | Height [mAU] | Area %  |
|--------|---------------|------|-------------|-------------|--------------|---------|
| 1      | 1.441         | BV   | 0.1005      | 7015.16748  | 1002.95532   | 98.5273 |

**B13: HPLC-2 (H<sub>2</sub>O/CH<sub>3</sub>OH 20:80, flow rate 0.6 mL/min)**

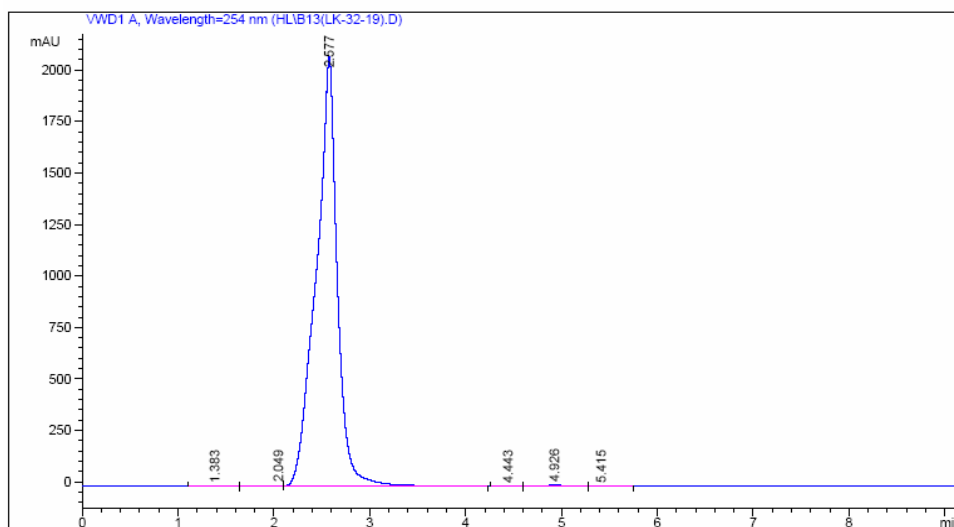

| Peak # | RetTime [min] | Type | Width [min] | Area mAU *s | Height [mAU] | Area %  |
|--------|---------------|------|-------------|-------------|--------------|---------|
| 3      | 2.577         | VB   | 0.2039      | 3.20494e4   | 2087.45288   | 99.5493 |
| 4      | 4.443         | BV   | 0.2333      | 18.03419    | 1.07675      | 0.0560  |
| 5      | 4.926         | VV   | 0.1905      | 89.57513    | 6.84766      | 0.2782  |
| 6      | 5.415         | VB   | 0.2623      | 8.32586     | 4.38531e-1   | 0.0259  |



**B15: HPLC-1 (H<sub>2</sub>O/CH<sub>3</sub>CN 30:70, flow rate 0.8 mL/min)**

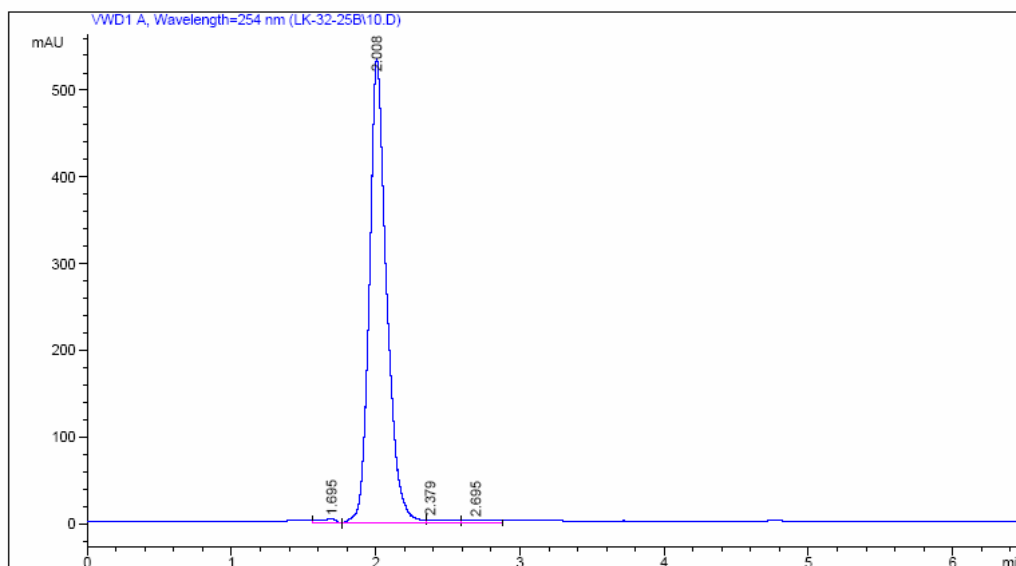

| Peak # | RetTime [min] | Type | Width [min] | Area mAU*s | Height [mAU] | Area %  |
|--------|---------------|------|-------------|------------|--------------|---------|
| 1      | 1.695         | VV   | 0.1083      | 36.68132   | 4.71187      | 0.8019  |
| 2      | 2.008         | VV   | 0.1191      | 4461.09326 | 535.11725    | 97.5286 |
| 3      | 2.379         | VV   | 0.1494      | 38.69138   | 3.34806      | 0.8459  |
| 4      | 2.695         | VV   | 0.1947      | 37.67315   | 2.50111      | 0.8236  |

**B15: HPLC-2 (H<sub>2</sub>O/CH<sub>3</sub>OH 20:80, flow rate 0.6 mL/min)**

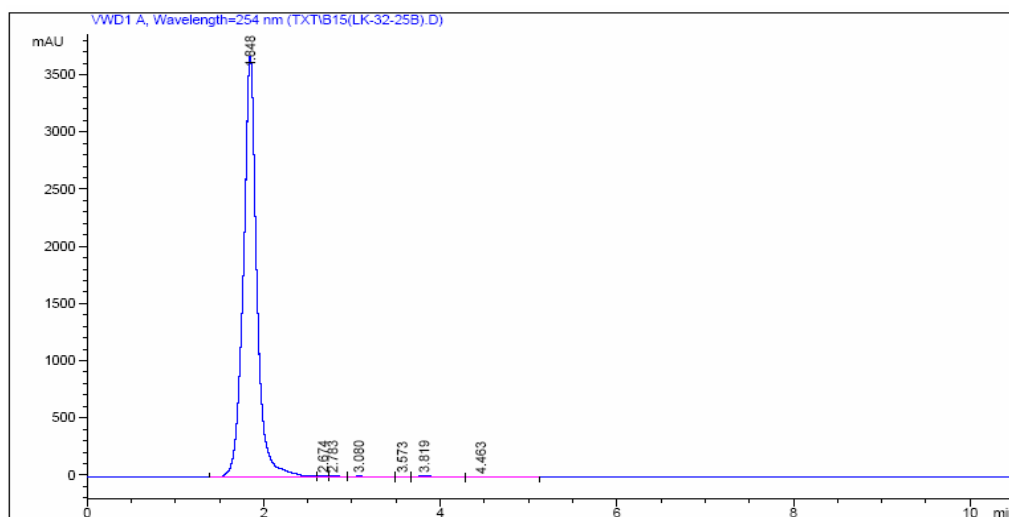

=====  
Area Percent Report  
=====

Sorted By : Signal  
Multiplier : 1.0000  
Dilution : 1.0000  
Use Multiplier & Dilution Factor with ISTDs

Signal 1: VWD1 A, Wavelength=254 nm

| Peak # | RetTime [min] | Type | Width [min] | Area mAU*s | Height [mAU] | Area %  |
|--------|---------------|------|-------------|------------|--------------|---------|
| 1      | 1.848         | BV   | 0.1525      | 3.94418e4  | 3685.48682   | 98.4877 |

**B18: HPLC-1 (H<sub>2</sub>O/CH<sub>3</sub>CN 30:70, flow rate 0.8 mL/min)**

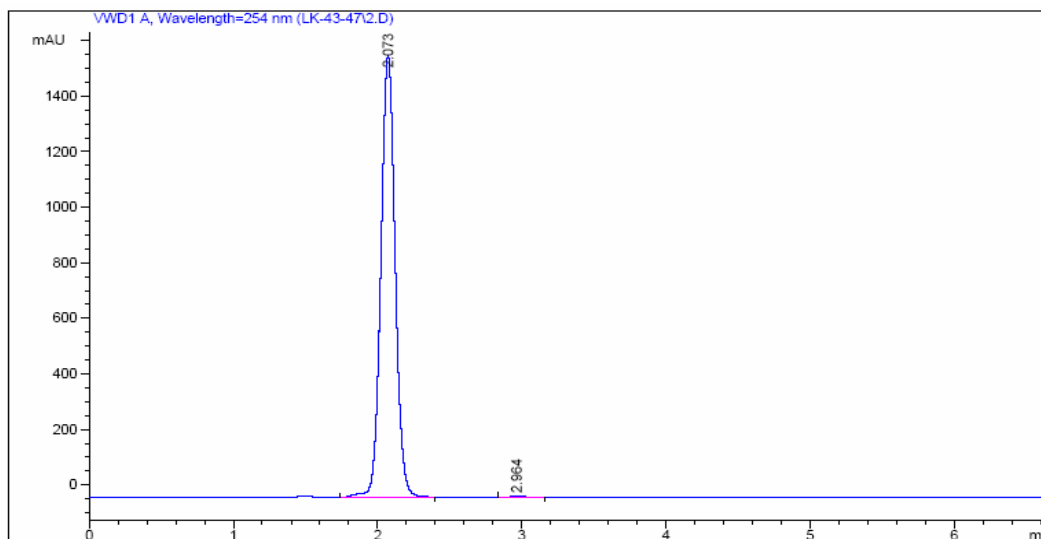

```

=====
                          Area Percent Report
=====

Sorted By      :      Signal
Multiplier    :      1.0000
Dilution      :      1.0000
Use Multiplier & Dilution Factor with ISTDs
  
```

Signal 1: VWD1 A, Wavelength=254 nm

| Peak # | RetTime [min] | Type | Width [min] | Area mAU *s | Height [mAU] | Area %  |
|--------|---------------|------|-------------|-------------|--------------|---------|
| 1      | 2.073         | VV   | 0.1072      | 1.10542e4   | 1593.14136   | 99.5603 |

**B18: HPLC-2 (H<sub>2</sub>O/CH<sub>3</sub>OH 20:80, flow rate 0.6 mL/min)**

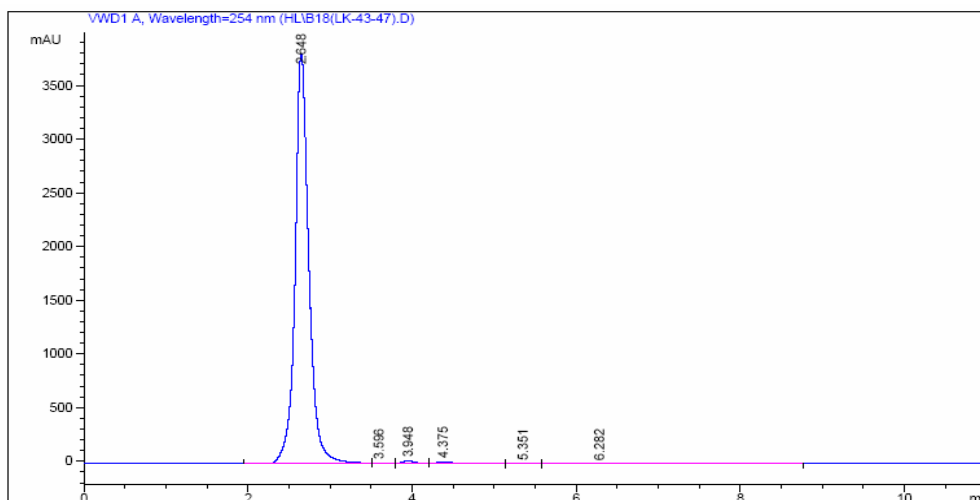

```

=====
                          Area Percent Report
=====

Sorted By      :      Signal
Multiplier    :      1.0000
Dilution      :      1.0000
Use Multiplier & Dilution Factor with ISTDs
  
```

Signal 1: VWD1 A, Wavelength=254 nm

| Peak # | RetTime [min] | Type | Width [min] | Area mAU *s | Height [mAU] | Area %  |
|--------|---------------|------|-------------|-------------|--------------|---------|
| 1      | 2.648         | BV   | 0.1696      | 4.45519e4   | 3817.99048   | 98.4591 |

**B19: HPLC-1 (H<sub>2</sub>O/CH<sub>3</sub>CN 30:70, flow rate 0.8 mL/min)**

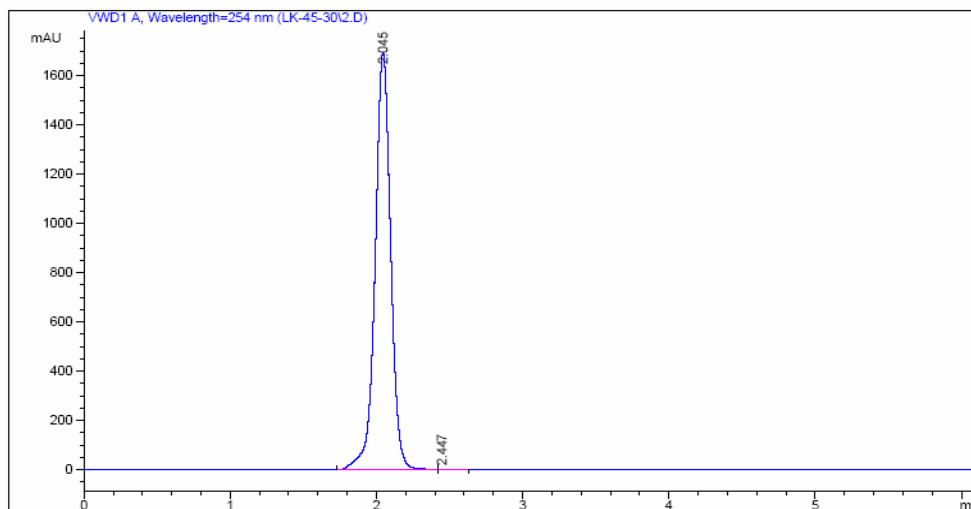

=====  
 Area Percent Report  
 =====

Sorted By : Signal  
 Multiplier : 1.0000  
 Dilution : 1.0000  
 Use Multiplier & Dilution Factor with ISTDs

Signal 1: VWD1 A, Wavelength=254 nm

| Peak # | RetTime [min] | Type | Width [min] | Area mAU  | Area *s | Height [mAU] | Area %  |
|--------|---------------|------|-------------|-----------|---------|--------------|---------|
| 1      | 2.045         | VV   | 0.1126      | 1.25565e4 |         | 1696.57605   | 99.7842 |

**B19: HPLC-2 (H<sub>2</sub>O/CH<sub>3</sub>OH 20:80, flow rate 0.6 mL/min)**

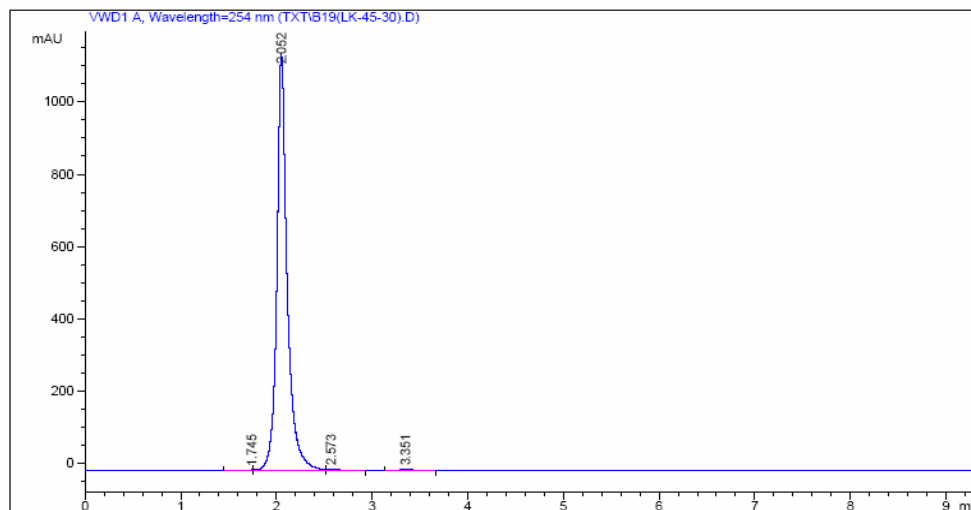

=====  
 Area Percent Report  
 =====

Sorted By : Signal  
 Multiplier : 1.0000  
 Dilution : 1.0000  
 Use Multiplier & Dilution Factor with ISTDs

Signal 1: VWD1 A, Wavelength=254 nm

| Peak # | RetTime [min] | Type | Width [min] | Area mAU   | Area *s | Height [mAU] | Area %  |
|--------|---------------|------|-------------|------------|---------|--------------|---------|
| 1      | 1.745         | BV   | 0.0922      | 14.74195   |         | 2.34809      | 0.1668  |
| 2      | 2.052         | VV   | 0.1073      | 8744.52930 |         | 1154.88965   | 98.9323 |

**B20: HPLC-1 (H<sub>2</sub>O/CH<sub>3</sub>CN 30:70, flow rate 0.8 mL/min)**

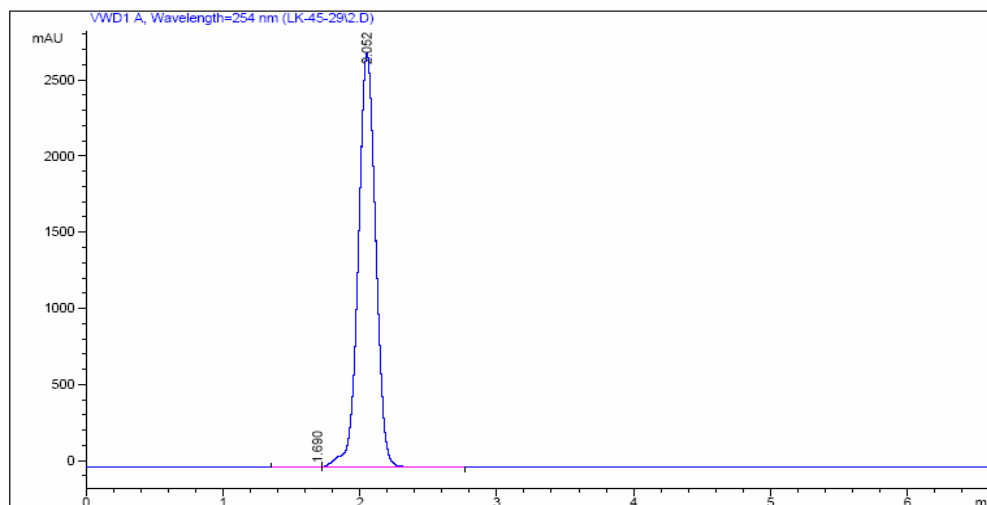

```

=====
                          Area Percent Report
=====
Sorted By      :      Signal
Multiplier    :      1.0000
Dilution      :      1.0000
Use Multiplier & Dilution Factor with ISTDs

Signal 1: VWD1 A, Wavelength=254 nm

Peak RetTime Type  Width   Area      Height   Area
# [min]          [min] mAU     *s      [mAU]    %
-----|-----|-----|-----|-----|-----|
  1  1.690 BV     0.1275  58.08959  6.15739  0.2398
  2  2.052 VV     0.1370  2.41636e4 2723.82471 99.7602
    
```

**B20: HPLC-2 (H<sub>2</sub>O/CH<sub>3</sub>OH 20:80, flow rate 0.6 mL/min)**

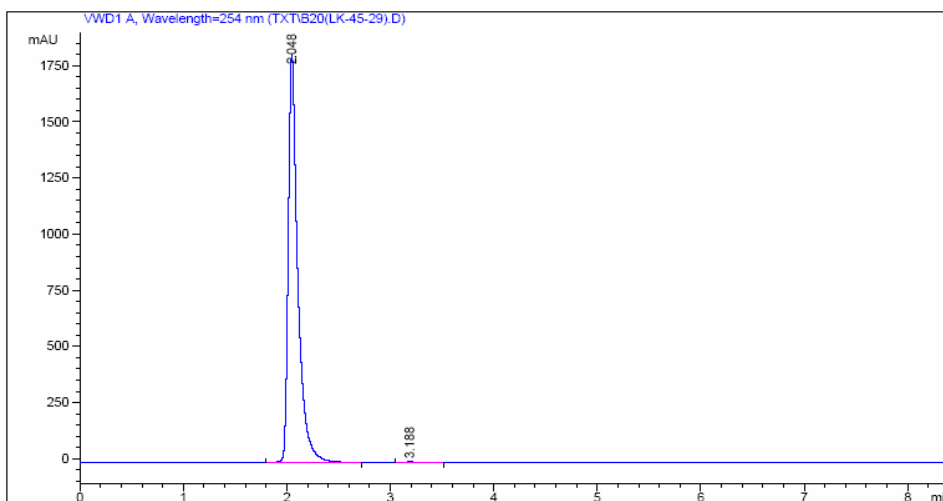

```

=====
                          Area Percent Report
=====
Sorted By      :      Signal
Multiplier    :      1.0000
Dilution      :      1.0000
Use Multiplier & Dilution Factor with ISTDs

Signal 1: VWD1 A, Wavelength=254 nm

Peak RetTime Type  Width   Area      Height   Area
# [min]          [min] mAU     *s      [mAU]    %
-----|-----|-----|-----|-----|
  1  2.048 VV     0.0924  1.16889e4 1821.20483 99.6620
    
```

**B21: HPLC-1 (H<sub>2</sub>O/CH<sub>3</sub>CN 30:70, flow rate 0.8 mL/min)**

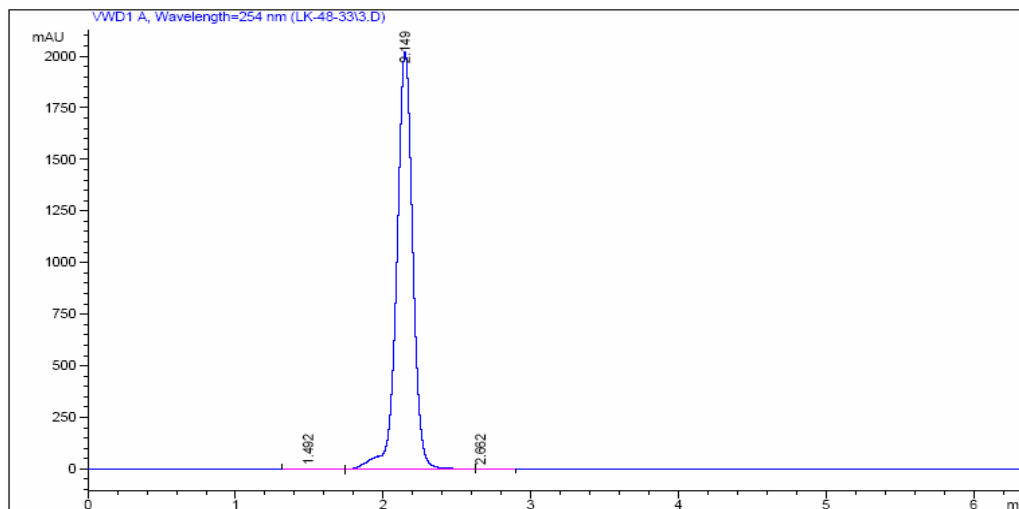

```

=====
                          Area Percent Report
=====

Sorted By      :      Signal
Multiplier    :      1.0000
Dilution      :      1.0000
Use Multiplier & Dilution Factor with ISTDs
  
```

Signal 1: VWD1 A, Wavelength=254 nm

| Peak # | RetTime [min] | Type | Width [min] | Area mAU  | Area *s    | Height [mAU] | Area %  |
|--------|---------------|------|-------------|-----------|------------|--------------|---------|
| 1      | 1.492         | BV   | 0.2458      | 47.97275  | 2.67226    | 2.67226      | 0.3102  |
| 2      | 2.149         | VV   | 0.1148      | 1.53851e4 | 2025.02637 | 2025.02637   | 99.4692 |

**B21: HPLC-2 (H<sub>2</sub>O/CH<sub>3</sub>OH 20:80, flow rate 0.6 mL/min)**

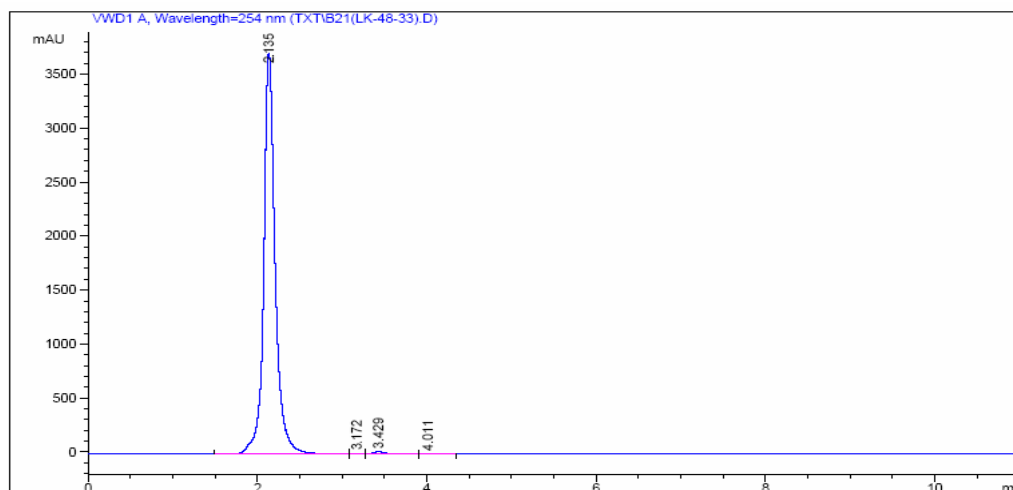

```

=====
                          Area Percent Report
=====

Sorted By      :      Signal
Multiplier    :      1.0000
Dilution      :      1.0000
Use Multiplier & Dilution Factor with ISTDs
  
```

Signal 1: VWD1 A, Wavelength=254 nm

| Peak # | RetTime [min] | Type | Width [min] | Area mAU  | Area *s    | Height [mAU] | Area %  |
|--------|---------------|------|-------------|-----------|------------|--------------|---------|
| 1      | 2.135         | BV   | 0.1375      | 3.49668e4 | 3715.42896 | 3715.42896   | 99.1581 |

**B22: HPLC-1 (H<sub>2</sub>O/CH<sub>3</sub>CN 30:70, flow rate 0.8 mL/min)**

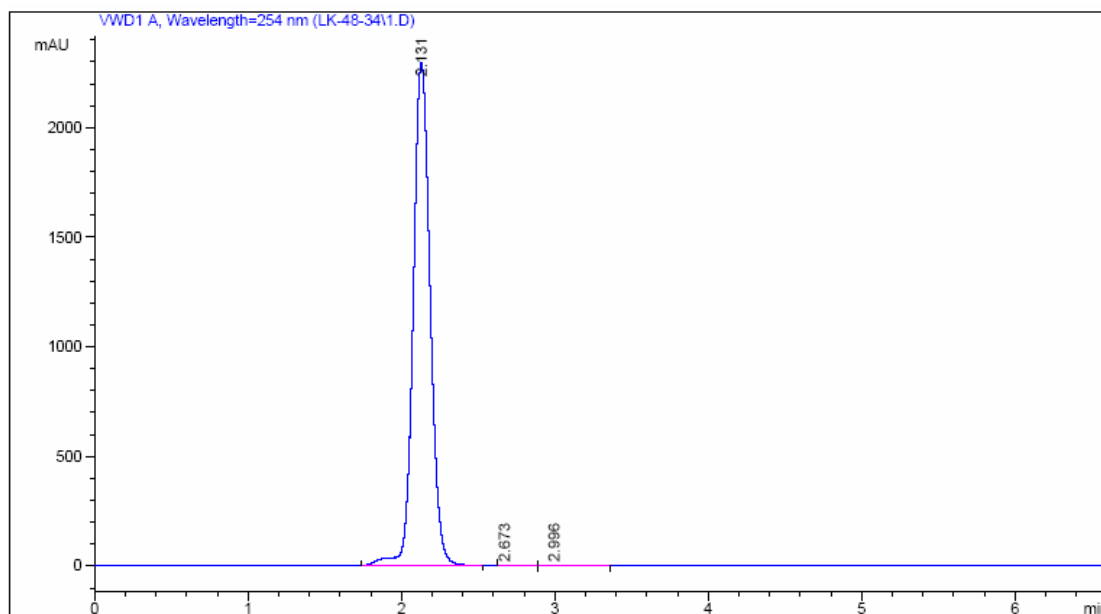

=====  
 Area Percent Report  
 =====

Sorted By : Signal  
 Multiplier : 1.0000  
 Dilution : 1.0000  
 Use Multiplier & Dilution Factor with ISTDs

Signal 1: VWD1 A, Wavelength=254 nm

| Peak # | RetTime [min] | Type | Width [min] | Area mAU *s | Height [mAU] | Area %  |
|--------|---------------|------|-------------|-------------|--------------|---------|
| 1      | 2.131         | VV   | 0.1194      | 1.77742e4   | 2297.73096   | 99.7049 |

**B22: HPLC-2 (H<sub>2</sub>O/CH<sub>3</sub>OH 20:80, flow rate 0.6 mL/min)**

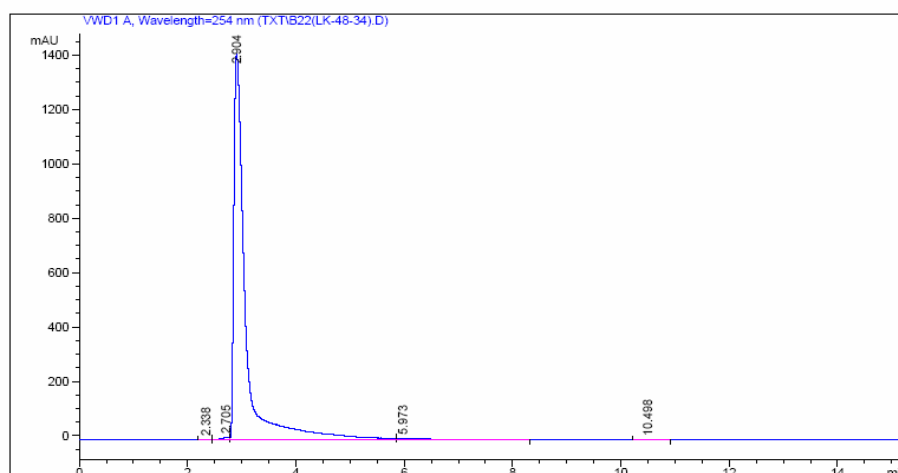

| Peak # | RetTime [min] | Type | Width [min] | Area mAU *s | Height [mAU] | Area %  |
|--------|---------------|------|-------------|-------------|--------------|---------|
| 3      | 2.904         | VV   | 0.2196      | 2.12571e4   | 1421.26331   | 98.1732 |
| 4      | 5.973         | VB   | 0.5376      | 249.75653   | 5.86450      | 1.1535  |
| 5      | 10.498        | BB   | 0.2431      | 32.86382    | 2.09083      | 0.1518  |
